# Supplementary material for: A Novel RNA Synthesis Inhibitor, STK160830, Has Negligible DNA-Intercalating Activity for Triggering A p53 Response, and Can Inhibit p53-Dependent Apoptosis
Source: MDPI journal article supplement (doi:10.3390/life11101087), 2021-10-15
Supplement: s1 [file s1]

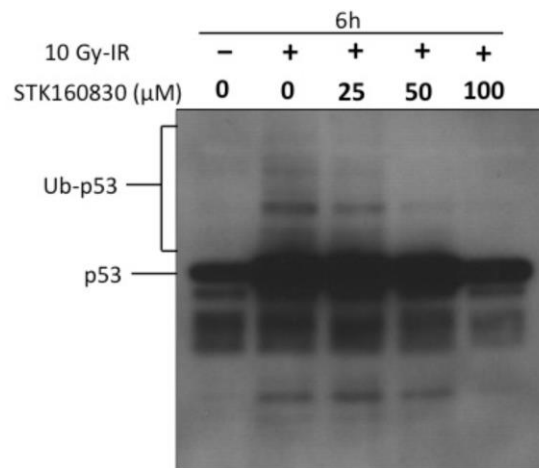

**Figure S1.**

Effect of STK160830 on the amount of high-molecular-weight p53 in irradiated MOLT-4 cells. Cells were collected at 6 h after 10 Gy-IR, and the proteins were detected by immunoblotting. The film exposure time for ECL emission was longer than usual to detect high-molecular-weight p53.

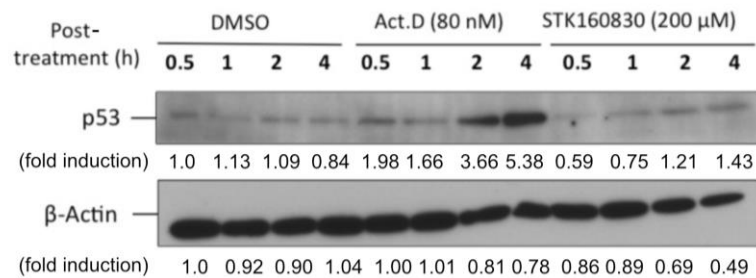

**Figure S2.**

Effect of 200  $\mu$ M STK160830 on the induction of p53 accumulation in irradiated MOLT-4 cells. Cells were collected at 6 h after 10 Gy-IR, and the proteins were detected by immunoblotting. Even when the concentration of STK160830 was increased to 200  $\mu$ M, the accumulation of p53 was slight.

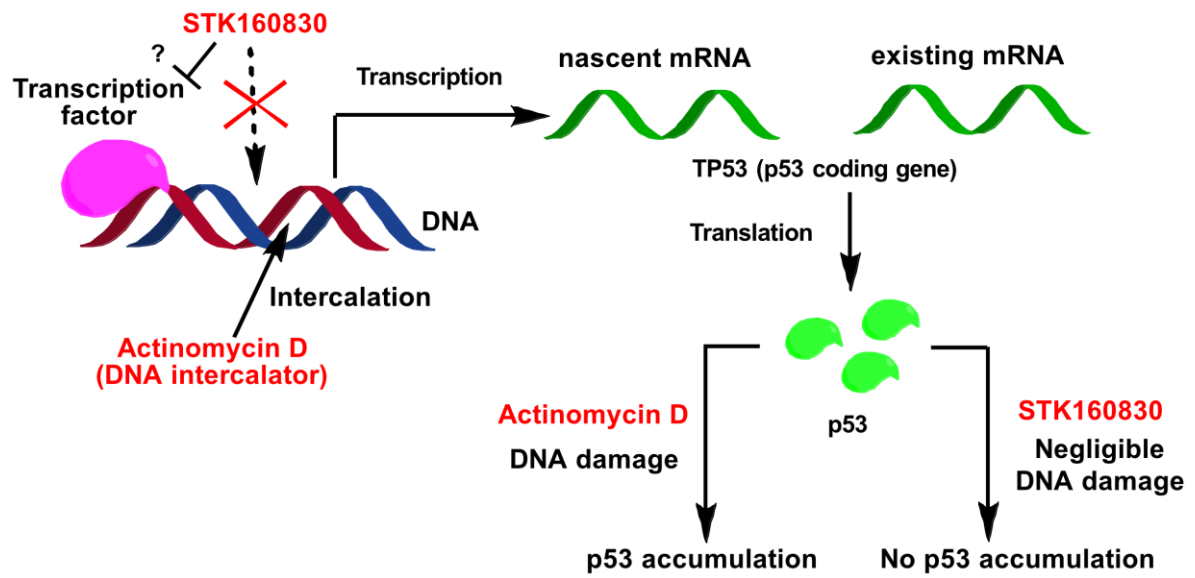

**Figure S3.**

Proposed scheme of RNA synthesis inhibition and p53 accumulation by STK160830 and Act.D.

Figure 4A

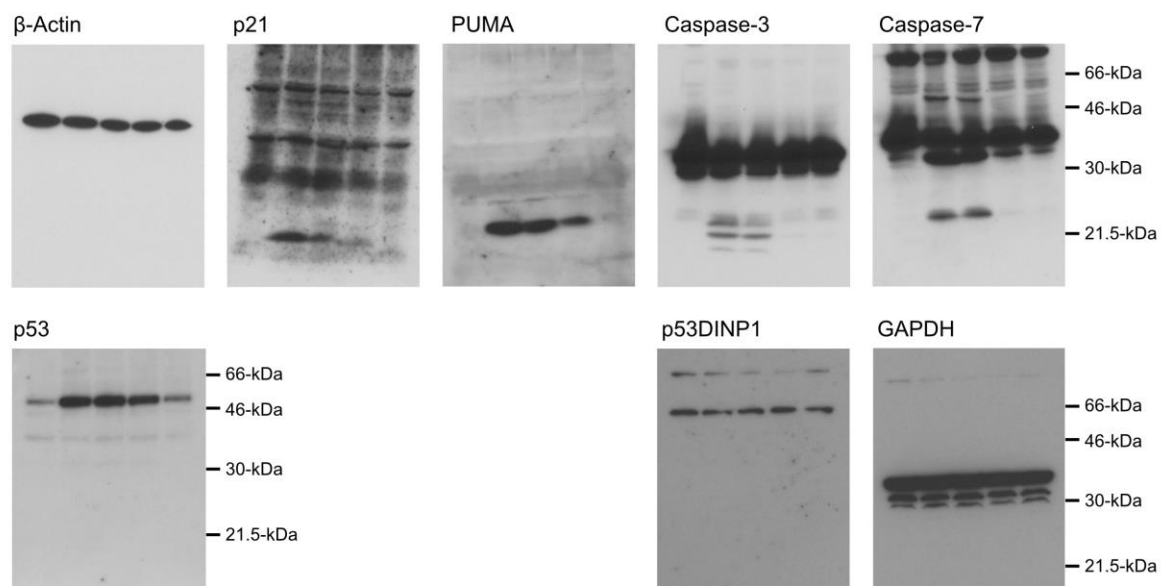

Figure 7A

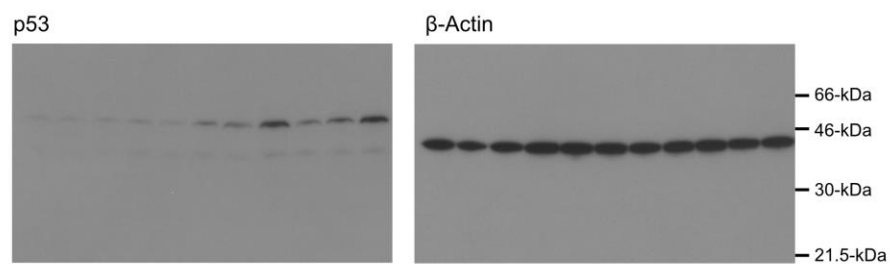

Figure S2

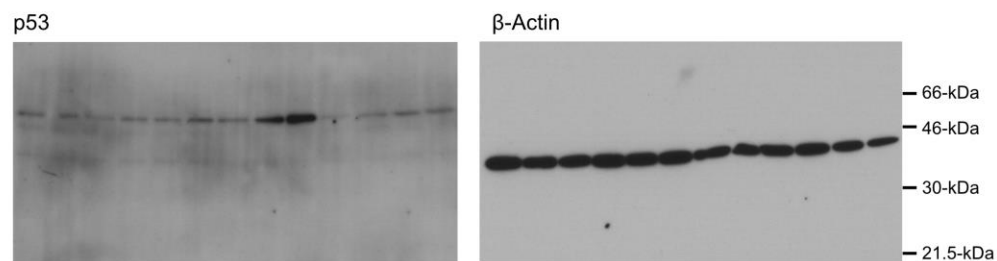

**Figure S4.**

Uncropped blots for immunoblotting figures.
